# Supplementary material
Source: ML conference proceedings conference paper supplement (https://openaccess.thecvf.com/content/CVPR2021/html/Sun_FSCE_Few-Shot_Object_CVPR_2021_paper.html)
Supplement: Supplementary file 1 [file Sun_FSCE_Few-Shot_Object_CVPR_2021_supplemental.pdf]

# FSCE: Few-Shot Object Detection via Contrastive Proposal Encoding (Supplementary materials)

Bo Sun<sup>1</sup>, Banghuai Li<sup>2\*</sup>, Shengcai Cai<sup>2</sup>, Ye Yuan<sup>2</sup>, and Chi Zhang<sup>2</sup>

<sup>1</sup>University of Southern California

<sup>2</sup>MEGVII Technology

bos@usc.edu, {libanghuai, caishengcai, yuanye, zhangchi}@megvii.com

## 1. Average results over random runs

Few-shot object detection performance is inherently unstable and heavily depends on the randomly sampled training shots. Hence, [1] suggests evaluating few-shot detection performance over a series of random runs to obtain statistically reliable comparisons. In this supplementary material, we provide full benchmark results over  $n$  random runs for PASCAL VOC and COCO. We report averaged AP, AP50 and AP75 for novel classes (nAP, nAP50, nAP75) from all three splits from PASCAL VOC. For COCO, we also report the averaged AP for small ( $nAP_s$ ), medium ( $nAP_m$ ) and large ( $nAP_l$ ) novel objects. Following the practices in TFA [1], we calculate and report the 95% confidence interval (CI) for each metric we reported. The 95% CI is given by

$$CI_{0.95} = Z_{0.95} \cdot \frac{\sigma}{\sqrt{n}} \quad (1)$$

where  $Z_{0.95} = 1.96$  is the Z-score for 95% CI,  $\sigma$  is the standard deviation, and  $n$  is the number of random runs. In our experiments, we perform  $n=10$  random runs for both PASCAL VOC and COCO datasets.

## 2. Results for PASCAL VOC and COCO

We present the complete few-shot object detection benchmark results of our proposed FSCE over random runs. The main baseline we are comparing with is the baseline two-stage fine-tuning approach (TFA [1]). As shown in Table 1 for PASCAL VOC and Table 2 for COCO, FSCE significantly outperforms baseline TFA and other methods in almost all shots from all data splits. With up to +9% nAP50 on PASCAL VOC, and +3.2% nAP on COCO. Results averaged over repeated runs with randomly selected training

shots, which are statistically stable and reliable, demonstrate the *state-of-the-art* few-shot object detection performance of our proposed method.

Code is available at <https://github.com/MegviiDetection/FSCE>.

## References

- [1] Xin Wang, Thomas E. Huang, Trevor Darrell, Joseph E Gonzalez, and Fisher Yu. Frustratingly simple few-shot object detection. In *International Conference on Machine Learning (ICML)*, July 2020. 1, 2
- [2] B. Kang, Z. Liu, X. Wang, F. Yu, J. Feng, and T. Darrell. Few-shot object detection via feature reweighting. In *2019 IEEE/CVF International Conference on Computer Vision (ICCV)*, pages 8419–8428, 2019. 2
- [3] Yu-Xiong Wang, Deva Ramanan, and Martial Hebert. Meta-Learning to Detect Rare Objects. In *2019 IEEE/CVF International Conference on Computer Vision (ICCV)*, pages 9924–9933, Seoul, Korea (South), October 2019. IEEE. 2
- [4] X. Yan, Z. Chen, A. Xu, X. Wang, X. Liang, and L. Lin. Meta r-cnn: Towards general solver for instance-level low-shot learning. In *2019 IEEE/CVF International Conference on Computer Vision (ICCV)*, pages 9576–9585, 2019. 2

\*Corresponding author: libanghuai@megvii.com

| # Shots | Method         | Novel Split 1   |                 |                 | Novel Split 2   |                 |                 | Novel Split 3   |                 |                 |
|---------|----------------|-----------------|-----------------|-----------------|-----------------|-----------------|-----------------|-----------------|-----------------|-----------------|
|         |                | nAP             | nAP50           | nAP75           | nAP             | nAP50           | nAP75           | nAP             | nAP50           | nAP75           |
| 1       | FRCN-baseline  | 6.0±0.7         | 9.9±1.2         | 6.3±0.8         | 5.0±0.6         | 9.4±1.2         | 4.5±0.7         | 4.5±0.7         | 8.1±1.3         | 4.2±0.7         |
|         | FSRW [2]       | 8.0±1.0         | 14.2±1.7        | 7.9±1.1         | 6.3±0.9         | 12.3±1.9        | 5.5±0.7         | 6.7±1.0         | 12.5±1.6        | 6.4±1.0         |
|         | TFA w/ fc [1]  | 12.2±1.6        | 22.9±2.5        | 11.6±1.9        | 8.1±1.2         | 16.9±2.3        | 6.6±1.1         | 7.8±1.1         | 15.7±2.1        | 6.5±1.0         |
|         | TFA w/ cos [1] | 14.2±1.4        | 25.3±2.2        | 14.2±1.8        | 9.0±1.2         | 18.3±2.4        | 7.8±1.2         | 9.6±1.1         | 17.9±2.0        | 9.1±1.2         |
|         | FSCE (Ours)    | <b>17.7±2.1</b> | <b>32.9±3.2</b> | <b>16.8±2.5</b> | <b>10.2±2.0</b> | <b>21.5±3.5</b> | <b>8.0±2.2</b>  | <b>11.1±2.0</b> | <b>22.1±3.9</b> | <b>9.4±2.1</b>  |
| 2       | FRCN-baseline  | 9.9±0.9         | 15.6±1.4        | 10.3±1.0        | 7.7±0.8         | 13.8±1.4        | 7.4±0.8         | 8.0±0.8         | 13.9±1.4        | 7.9±0.9         |
|         | FSRW [2]       | 13.2±1.0        | 23.6±1.7        | 12.7±1.1        | 9.9±0.7         | 19.6±1.3        | 8.8±0.6         | 11.3±0.7        | 21.3±1.0        | 10.6±0.8        |
|         | TFA w/ fc [1]  | 18.9±1.5        | 34.5±2.6        | 18.4±1.9        | 13.1±1.0        | 26.4±1.9        | 11.3±1.1        | 14.2±1.2        | 27.2±2.0        | 12.6±1.3        |
|         | TFA w/ cos [1] | 21.7±1.0        | 36.4±1.6        | 22.8±1.3        | 14.1±0.9        | 27.5±1.6        | 12.7±1.0        | 15.1±1.3        | 27.2±2.1        | <b>14.4±1.5</b> |
|         | FSCE (Ours)    | <b>24.2±1.8</b> | <b>44.0±2.6</b> | <b>23.6±2.6</b> | <b>15.1±2.1</b> | <b>30.6±3.5</b> | <b>12.8±2.4</b> | <b>17.0±1.8</b> | <b>33.4±3.4</b> | 14.3±1.9        |
| 3       | FRCN-baseline  | 13.7±1.0        | 21.6±1.6        | 14.8±1.1        | 9.8±0.9         | 17.4±1.6        | 9.4±1.0         | 11.1±0.9        | 19.0±1.5        | 11.2±1.0        |
|         | FSRW [2]       | 16.8±0.9        | 29.8±1.6        | 16.5±1.0        | 12.5±0.7        | 25.1±1.4        | 10.4±0.7        | 14.2±0.7        | 26.8±1.4        | 13.1±0.7        |
|         | TFA w/ fc [1]  | 22.6±1.2        | 40.4±1.7        | 22.4±1.7        | 15.2±0.8        | 30.5±1.5        | 13.1±0.8        | 18.1±1.0        | 34.7±1.6        | 16.2±1.3        |
|         | TFA w/ cos [1] | 25.4±0.9        | 42.1±1.5        | <b>27.0±1.2</b> | 16.0±0.8        | 30.9±1.6        | 14.4±0.9        | 18.9±1.0        | 34.3±1.7        | <b>18.1±1.4</b> |
|         | FSCE (Ours)    | <b>25.4±1.4</b> | <b>46.9±2.5</b> | 24.3±1.9        | <b>18.1±1.6</b> | <b>38.4±2.4</b> | <b>14.5±1.9</b> | <b>19.3±1.4</b> | <b>39.5±3.1</b> | 16.0±1.3        |
| 5       | FRCN-baseline  | 17.9±1.1        | 28.0±1.7        | 19.2±1.3        | 12.4±0.9        | 21.9±1.5        | 12.1±0.9        | 14.0±0.9        | 23.9±1.7        | 13.7±0.9        |
|         | FSRW [2]       | 20.6±0.8        | 36.5±1.4        | 20.0±0.9        | 15.7±0.8        | 31.4±1.5        | 13.3±0.9        | 18.0±0.7        | 33.8±1.4        | 16.5±0.8        |
|         | TFA w/ fc [1]  | 25.9±1.0        | 46.7±1.4        | 25.3±1.2        | 17.5±0.7        | 34.6±1.1        | 15.5±0.9        | 21.4±0.9        | 40.8±1.3        | 19.4±1.0        |
|         | TFA w/ cos [1] | 28.9±0.9        | 47.9±1.2        | 30.6±1.0        | 17.8±0.8        | 34.1±1.4        | 16.2±1.0        | 22.8±0.9        | 40.8±1.4        | 22.1±1.1        |
|         | FSCE (Ours)    | <b>30.7±1.2</b> | <b>52.9±1.9</b> | <b>31.3±1.4</b> | <b>22.0±0.7</b> | <b>43.0±1.4</b> | <b>19.8±0.9</b> | <b>25.5±1.5</b> | <b>47.3±2.5</b> | <b>23.7±1.7</b> |
| 10      | FRCN-baseline  | 22.7±0.9        | 35.6±1.5        | 24.4±1.0        | 17.0±0.8        | 29.8±1.4        | 16.7±0.9        | 18.4±0.8        | 31.0±1.2        | 18.7±1.0        |
|         | TFA w/ fc [1]  | 29.3±0.7        | 52.0±1.1        | 29.0±0.9        | 20.2±0.5        | 39.7±0.9        | 18.0±0.7        | 23.3±0.8        | 44.6±1.1        | 21.0±1.2        |
|         | TFA w/ cos [1] | 32.0±0.6        | 52.8±1.0        | 33.7±0.7        | 20.8±0.6        | 39.5±1.1        | 19.2±0.6        | 25.4±0.7        | 45.6±1.1        | 24.7±1.1        |
|         | FSCE (Ours)    | <b>34.0±1.0</b> | <b>58.7±1.7</b> | <b>35.0±1.3</b> | <b>25.2±0.9</b> | <b>48.5±1.7</b> | <b>23.1±1.0</b> | <b>29.2±1.4</b> | <b>54.0±1.9</b> | <b>27.5±1.5</b> |

Table 1. The averaged few-shot object detection performance on PASCAL VOC. For each metric, we report the mean and 95% confidence interval over 10 random runs.

| # Shots | Method         | Novel Average Precision |                 |                 |                |                 |                 |
|---------|----------------|-------------------------|-----------------|-----------------|----------------|-----------------|-----------------|
|         |                | nAP                     | nAP50           | nAP75           | nAPs           | nAPm            | nAPl            |
| 10      | MetaDet [3]    | 7.1±n/a                 | 14.6±n/a        | 6.1±n/a         | 1.0±n/a        | 4.1±n/a         | 12.2±n/a        |
|         | Meta R-CNN [4] | 8.7±n/a                 | 19.1±n/a        | 6.6±n/a         | 2.3±n/a        | 7.7±n/a         | 14.0±n/a        |
|         | TFA w/ fc [1]  | 9.1±0.4                 | 17.3±0.6        | 8.5±0.4         | -              | -               | -               |
|         | TFA w/ cos [1] | 9.1±0.4                 | 17.1±0.7        | 8.8±0.5         | -              | -               | -               |
|         | FSCE (Ours)    | <b>11.1±0.2</b>         | <b>23.0±0.4</b> | <b>9.8±0.3</b>  | <b>3.5±0.4</b> | <b>10.9±0.3</b> | <b>16.6±0.5</b> |
| 30      | MetaDet [3]    | 11.3±n/a                | 21.7±n/a        | 8.1±n/a         | 1.1±n/a        | 6.2±n/a         | 17.3±n/a        |
|         | Meta R-CNN [4] | 12.4±n/a                | 25.3±n/a        | 10.8±n/a        | 2.8±n/a        | 11.6±n/a        | 19.0±n/a        |
|         | TFA w/ fc [1]  | 12.0±0.4                | 22.2±0.6        | 11.8±0.4        | -              | -               | -               |
|         | TFA w/ cos [1] | 12.1±0.4                | 22.0±0.7        | 12.0±0.5        | -              | -               | -               |
|         | FSCE (Ours)    | <b>15.3±0.3</b>         | <b>29.0±0.5</b> | <b>14.2±0.3</b> | <b>5.2±0.5</b> | <b>15.4±0.4</b> | <b>22.6±0.8</b> |

Table 2. The averaged few-shot object detection performance on COCO. For each metric, we report the mean and 95% confidence interval over 10 random runs. The “n/a” here indicates the confidence intervals are not reported by the authors.
